# Supplementary material
Source: PubMed Central journal article supplement (PMC3563935)

Figure S1

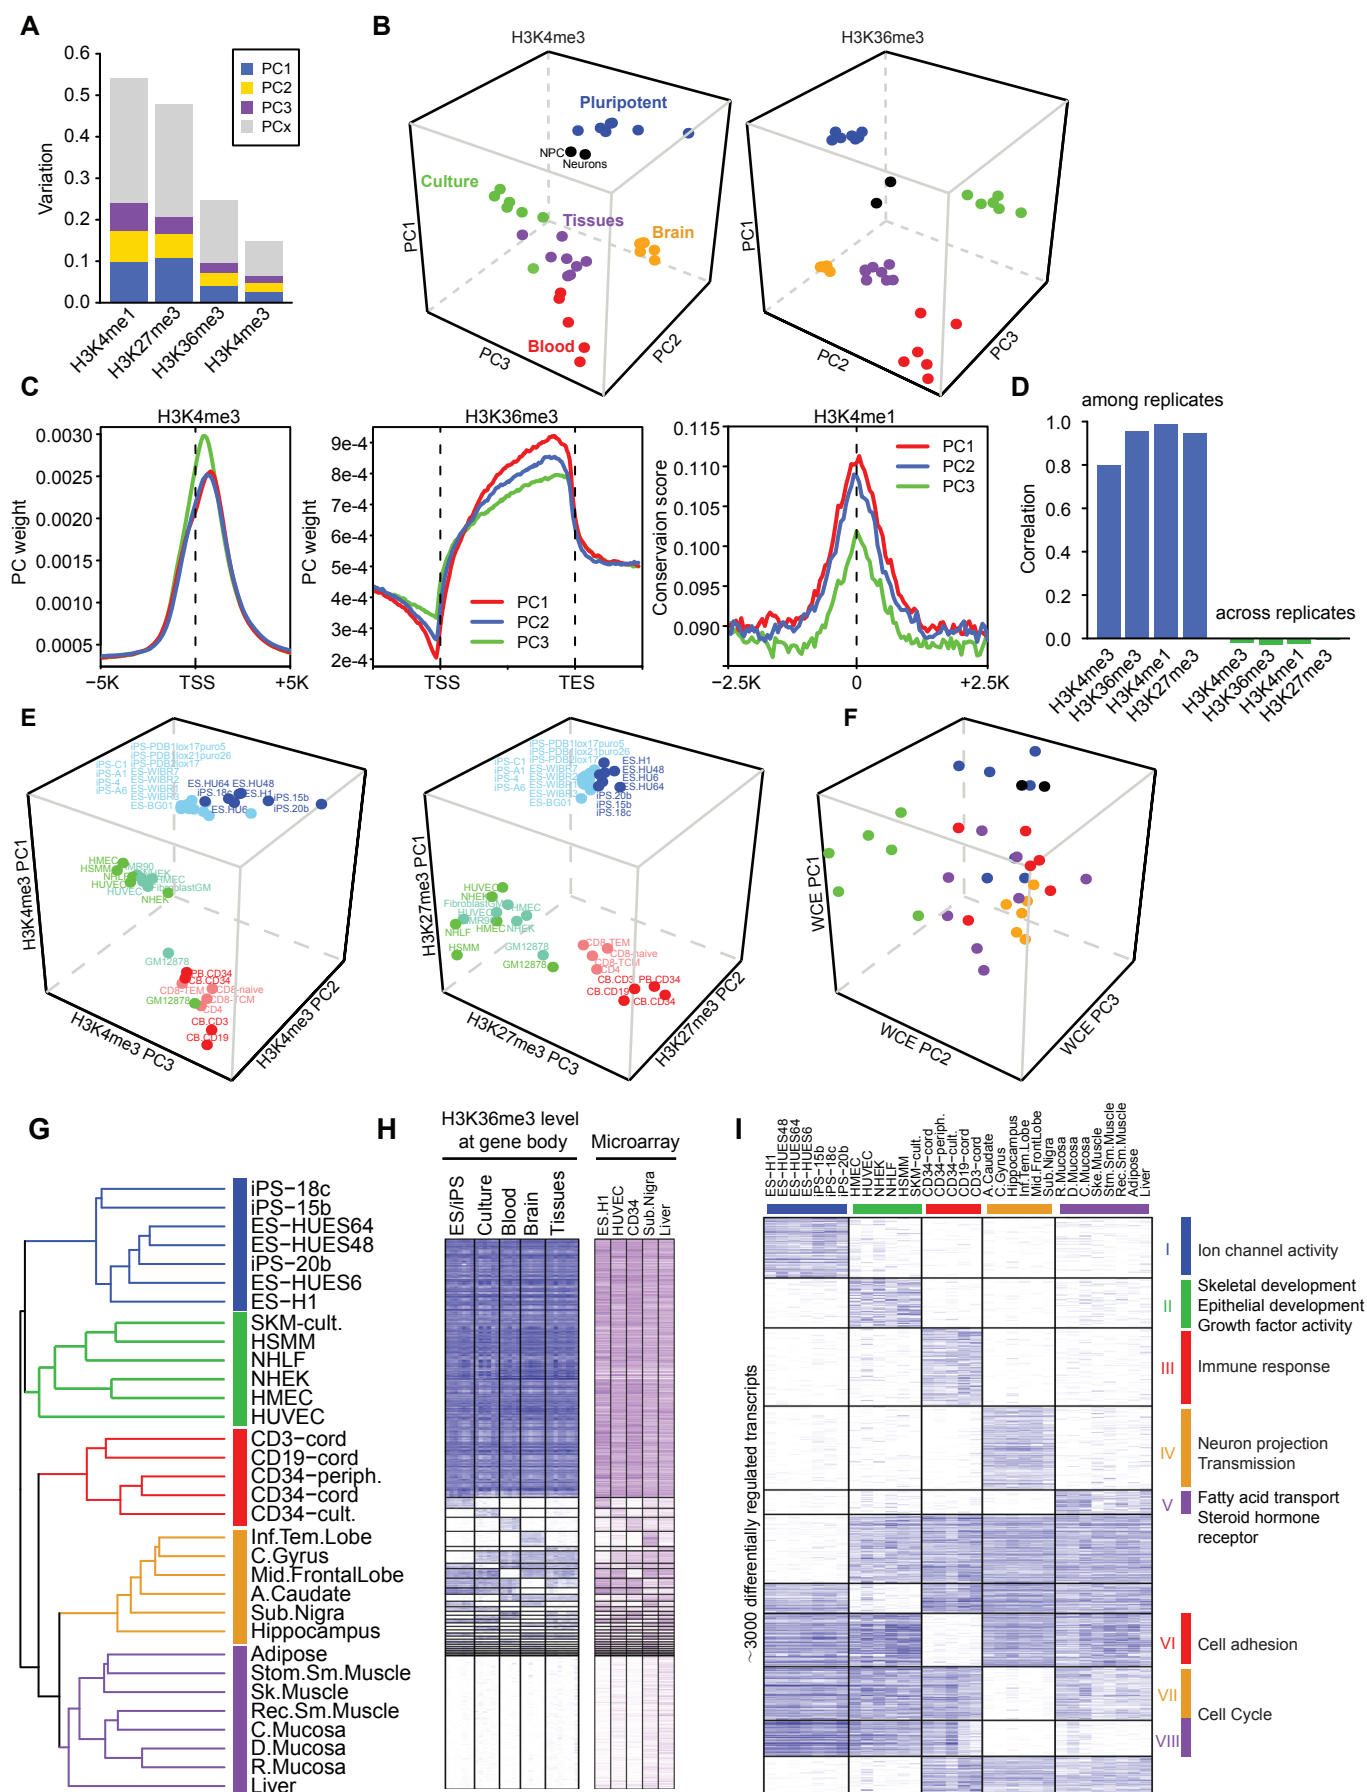

Figure S2

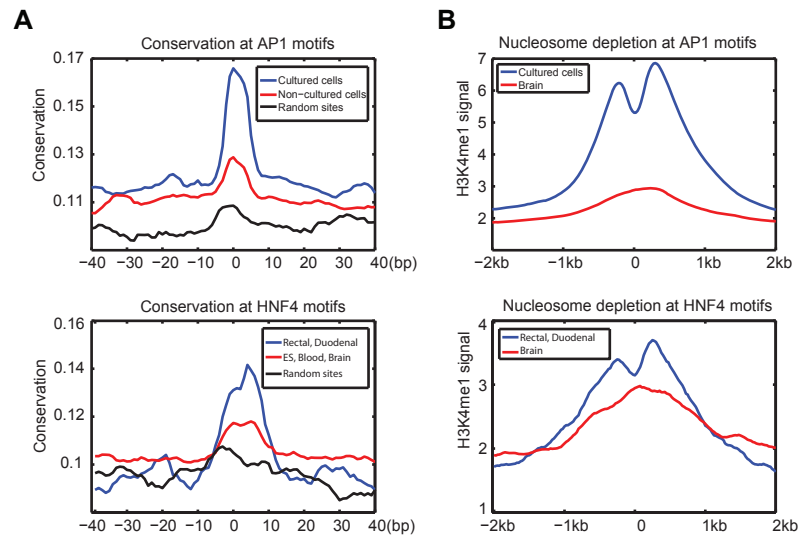

**C**

| Cluster | Cell types           | Enriched motifs | TF ChIP-seq |                |       |      |
|---------|----------------------|-----------------|-------------|----------------|-------|------|
|         |                      |                 | Oct4        | Irf4           | Pu.1  | Hnf4 |
|         |                      |                 | ES cells    | lymphoblastoid | HepG2 |      |
| 8       | ES, iPS, NPC, Neuron | Oct4, Sox2      | 200         | 4              | 8     | 9    |
| 9       | ES, iPS              | Oct4, Sox2      | 140         | 2              | 6     | 3    |
| 16      | Blood lineages       | Pu.1, Irf4      | 10          | 47             | 124   | 15   |
| 17      | B-cells              | Pu.1, Irf4      | 0           | 52             | 124   | 4    |
| 21      | Liver, mucosa        | HNF4a, PPAR     | 10          | 4              | 11    | 37   |

Figure S3

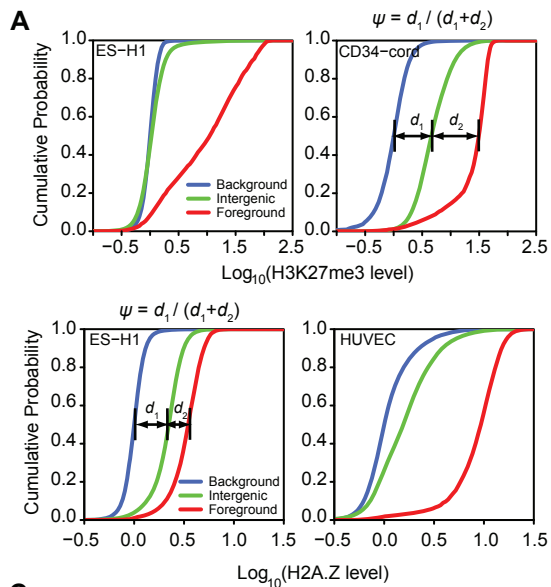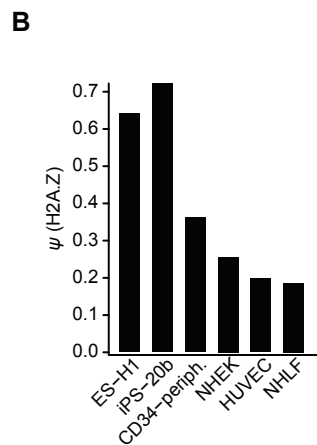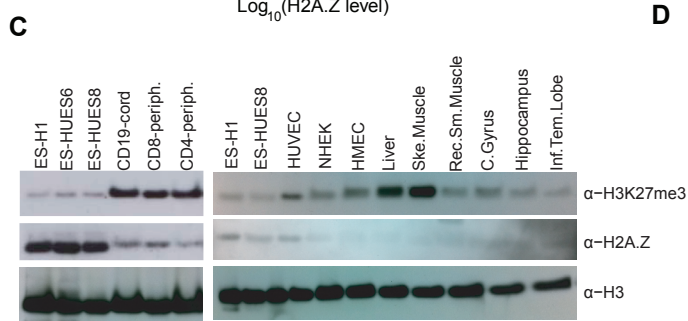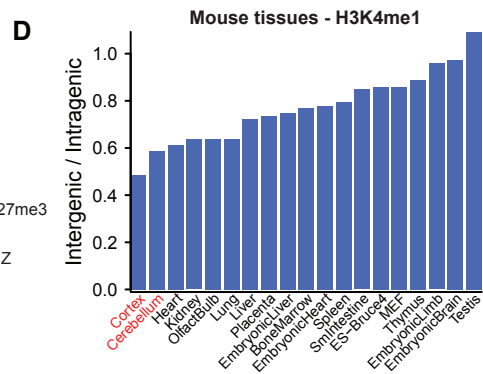

Figure S4

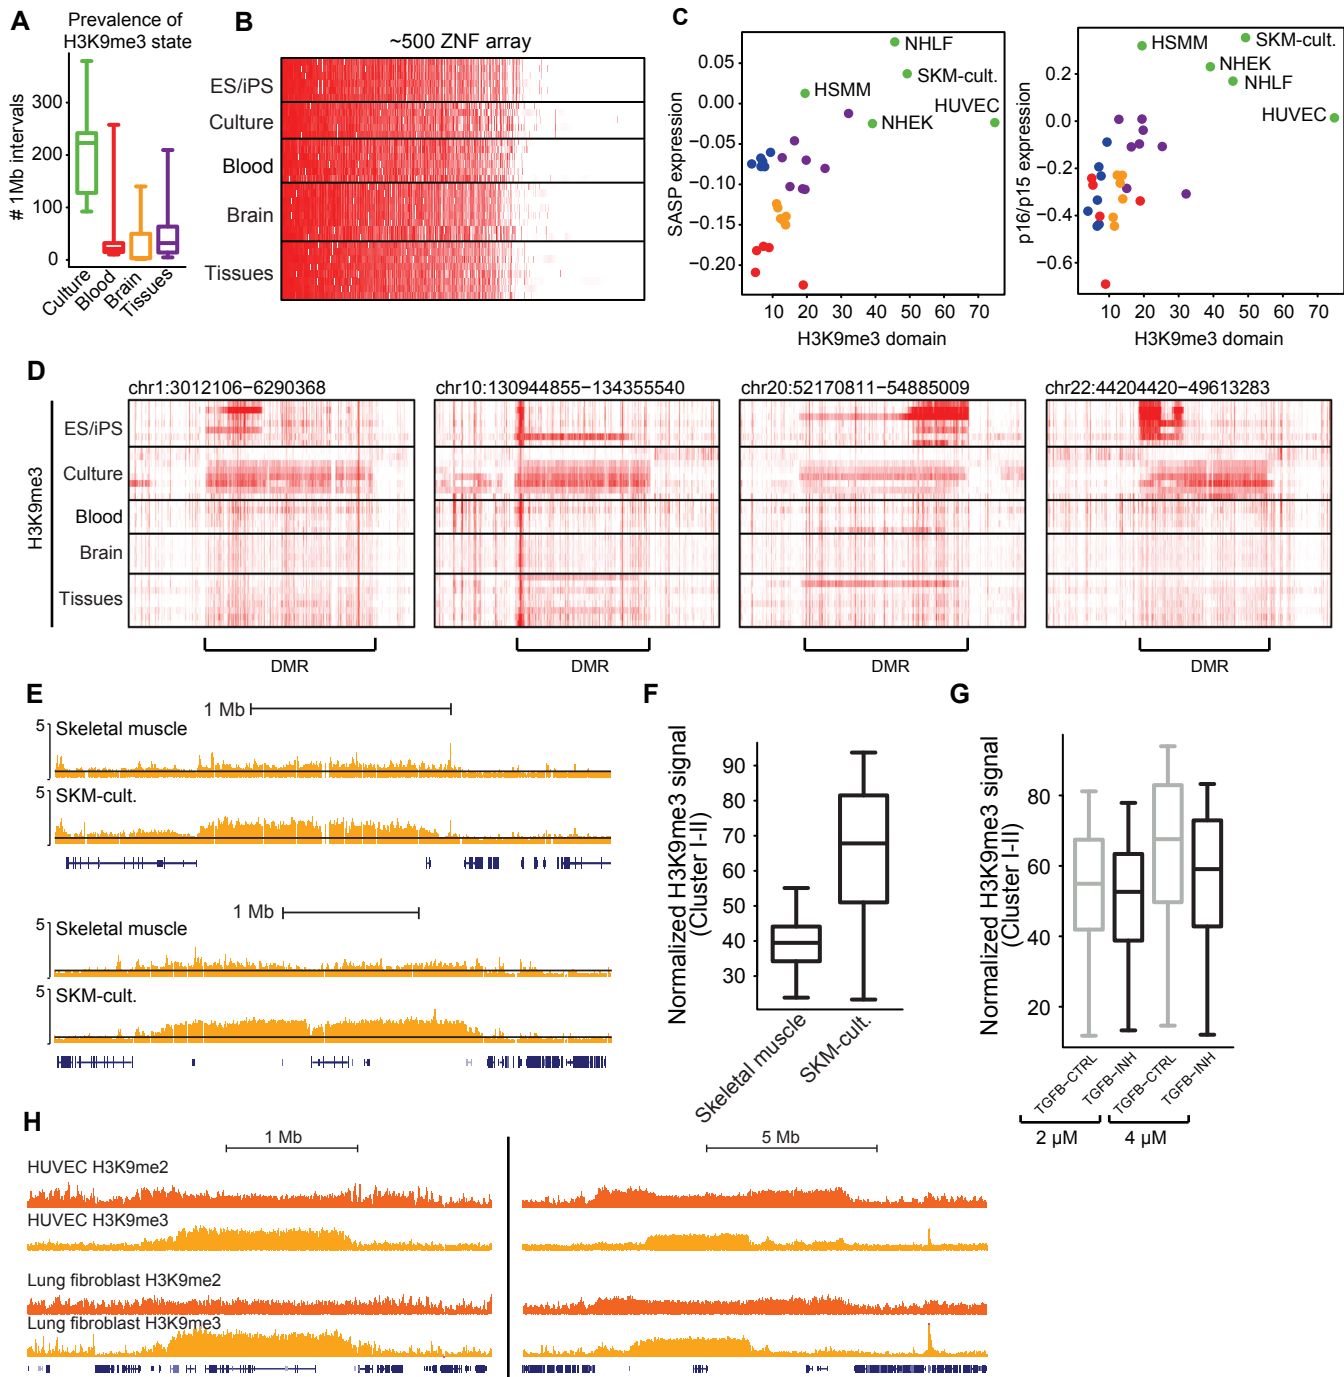

Supplement: NIHMS431978-supplement-04.pdf [file NIHMS431978-supplement-04.pdf]
